# Supplementary material for: Contamination Evaluation of Heavy Metals in a Sediment Core from the Al-Salam Lagoon, Jeddah Coast, Saudi Arabia
Source: MDPI journal article supplement (doi:10.3390/jmse9080899), 2021-08-20
Supplement: s1 [file s1]

**Supplementary Table S1. Mud %, Sand %, Gravel%, LOI %, CaCo3 %, and heavy metals concentration (Fe, Mn, Cr, Zn, Cu, Ni, and Pb) in the core SALAM1 sediments from Al-Salam Lagoon, Jeddah coast- Saudi Arabia.**

| Sample No | Depth (cm) | Mud  | Sand | Gravel | LOI   | CaCO <sub>3</sub>  | Fe   | Mn    | Cr    | Zn    | Cu  | Ni    | Pb  |
|-----------|------------|------|------|--------|-------|--------------------|------|-------|-------|-------|-----|-------|-----|
| %         |            |      |      |        |       | µg g <sup>-1</sup> |      |       |       |       |     |       |     |
| 1         | 0.5        | 78.4 | 19.9 | 1.7    | 4.55  | 47.06              | 365  | 301.3 | 56.3  | 302.3 | 260 | 179   | 18  |
| 2         | 3.5        | 95.2 | 4.8  | 0.0    | 5.06  | 37.65              | 645  | 436.8 | 58.3  | 430.4 | 253 | 64.7  | 83  |
| 3         | 6.5        | 95.2 | 4.8  | 0.0    | 7.27  | 37.06              | 433  | 434.7 | 57.8  | 408.7 | 260 | 66.9  | 80  |
| 4         | 9.5        | 93.2 | 6.8  | 0.0    | 6.39  | 35.29              | 577  | 450   | 54.5  | 416.2 | 274 | 65.6  | 84  |
| 5         | 12.5       | 90.6 | 9.4  | 0.0    | 7.21  | 37.65              | 410  | 393.4 | 49.7  | 411.4 | 204 | 60.6  | 86  |
| 6         | 15.5       | 90.7 | 9.3  | 0.0    | 8.11  | 37.06              | 376  | 358.7 | 46.7  | 388.3 | 185 | 53.8  | 78  |
| 7         | 18.5       | 87.0 | 11.2 | 1.8    | 8.2   | 37.65              | 455  | 368.9 | 50.4  | 340   | 217 | 55.5  | 83  |
| 8         | 21.5       | 63.4 | 36.6 | 0.0    | 7.65  | 45.88              | 346  | 314.1 | 54.2  | 359.4 | 339 | 266.8 | 84  |
| 9         | 24.5       | 47.0 | 51.3 | 1.6    | 7.34  | 52.94              | 328  | 242.9 | 51.5  | 336.4 | 129 | 46.1  | 67  |
| 10        | 27.5       | 56.6 | 41.2 | 2.3    | 7.29  | 52.35              | 286  | 238.7 | 50.1  | 329.7 | 126 | 45.6  | 82  |
| 11        | 30.5       | 84.8 | 15.2 | 0.0    | 10.44 | 48.82              | 502  | 300   | 72.3  | 830   | 435 | 80.2  | 332 |
| 12        | 33.5       | 65.5 | 34.5 | 0.0    | 8.61  | 44.12              | 345  | 222   | 60    | 323.5 | 160 | 54.2  | 86  |
| 13        | 37.5       | 84.3 | 14.1 | 1.6    | 9.12  | 52.94              | 281  | 241   | 60.9  | 351.3 | 131 | 51    | 106 |
| 14        | 39.5       | 65.5 | 34.5 | 0.0    | 10.23 | 55.29              | 271  | 204.5 | 61.1  | 419.1 | 137 | 54.3  | 116 |
| 15        | 42.5       | 62.1 | 37.9 | 0.0    | 26.71 | 30.59              | 368  | 324.2 | 63.4  | 236.5 | 176 | 59.1  | 106 |
| 16        | 45.5       | 86.6 | 12.1 | 1.3    | 19.14 | 38.82              | 370  | 266.1 | 79.7  | 524   | 371 | 73.7  | 265 |
| 17        | 48.5       | 81.4 | 18.6 | 0.0    | 13.3  | 52.94              | 219  | 201.3 | 74.2  | 336.5 | 242 | 56    | 185 |
| 18        | 51.5       | 88.3 | 11.7 | 0.0    | 15.14 | 48.24              | 302  | 256.6 | 79.6  | 404.5 | 366 | 60.6  | 241 |
| 19        | 54.5       | 92.2 | 7.1  | 0.7    | 11.76 | 50.59              | 290  | 313.3 | 85.5  | 281.5 | 202 | 63.3  | 168 |
| 20        | 57.5       | 95.8 | 4.2  | 0.0    | 13.08 | 49.41              | 266  | 282.5 | 77.9  | 206.5 | 180 | 58.6  | 32  |
| 21        | 60.5       | 96.3 | 3.7  | 0.0    | 12.75 | 51.18              | 284  | 297.8 | 79.8  | 210.2 | 74  | 55.9  | 23  |
| 22        | 63.5       | 97.6 | 2.4  | 0.0    | 13.08 | 49.41              | 258  | 268   | 76.2  | 270   | 96  | 53.6  | 25  |
| 23        | 65.5       | 94.6 | 4.5  | 0.9    | 10.37 | 52.94              | 226  | 221.4 | 66.9  | 171.9 | 57  | 45.1  | 63  |
| 24        | 69.5       | 84.3 | 13.0 | 2.8    | 6.24  | 55.29              | 187  | 172.9 | 62.5  | 411.8 | 38  | 45.6  | 53  |
| 25        | 72.5       | 76.8 | 22.4 | 0.8    | 3.79  | 57.65              | 129  | 128.3 | 52.9  | 55.5  | 17  | 38.3  | 20  |
| 26        | 75.5       | 71.4 | 28.0 | 0.6    | 3.33  | 60                 | 123  | 131.4 | 53.1  | 57.3  | 17  | 39    | 16  |
| 27        | 78.5       | 88.9 | 11.1 | 0.0    | 3.43  | 57.65              | 164  | 151.7 | 56.2  | 171.2 | 18  | 40.3  | 36  |
| 28        | 81.5       | 83.9 | 16.1 | 0.0    | 3.97  | 51.76              | 165  | 155.3 | 56.7  | 57.7  | 17  | 39.9  | 33  |
| 29        | 84.5       | 93.5 | 6.5  | 0.0    | 2.2   | 48.24              | 114  | 191.4 | 46.9  | 198.9 | 9   | 31.5  | 36  |
| 30        | 87.5       | 87.4 | 12.6 | 0.0    | 2.91  | 52.94              | 143  | 141   | 55.5  | 204   | 15  | 38.5  | 24  |
| 31        | 90.5       | 98.0 | 2.1  | 0.0    | 2.32  | 52.94              | 109  | 99.2  | 48.9  | 115.7 | 11  | 34.8  | 25  |
| 32        | 93.5       | 98.2 | 1.8  | 0.0    | 2.42  | 56.47              | 134  | 114.9 | 53.3  | 59.3  | 13  | 38.4  | 23  |
| 33        | 96.5       | 97.6 | 2.4  | 0.0    | 3.29  | 60.59              | 91.1 | 98.7  | 55.9  | 46.8  | 12  | 38    | 41  |
| 34        | 99.5       | 99.5 | 0.5  | 0.0    | 4.69  | 61.76              | 168  | 124.2 | 61.7  | 46.3  | 15  | 42.2  | 41  |
| 35        | 104.5      | 99.5 | 0.5  | 0.0    | 4.36  | 58.82              | 35   | 45.7  | 32.6  | 21.2  | 3   | 18.9  | 28  |
| 36        | 109.5      | 99.5 | 0.5  | 0.0    | 5.17  | 61.18              | 187  | 236   | 109.8 | 385.1 | 31  | 79.8  | 62  |
| 37        | 114.5      | 36.9 | 53.7 | 9.4    | 3.61  | 58.82              | 85   | 113.6 | 59.7  | 66.8  | 13  | 38.2  | 42  |
| 38        | 119.5      | 45.5 | 45.8 | 8.8    | 3.89  | 60                 | 75   | 110.3 | 57.3  | 87.7  | 13  | 38    | 43  |
| 39        | 124.5      | 50.5 | 42.0 | 7.4    | 3.03  | 52.94              | 114  | 111.4 | 60.1  | 40.3  | 14  | 40.4  | 20  |
| 40        | 129.5      | 54.9 | 37.7 | 7.4    | 2.89  | 56.47              | 125  | 97.9  | 61.1  | 45.6  | 12  | 37.6  | 37  |
| 41        | 134.5      | 64.9 | 28.6 | 6.5    | 2.45  | 60                 | 91   | 108.3 | 63.9  | 90    | 15  | 36.9  | 41  |
| 42        | 139.5      | 62.5 | 31.4 | 6.1    | 2.44  | 55.29              | 121  | 114.8 | 63.3  | 185.2 | 16  | 39.3  | 38  |

|                |       |             |             |             |              |              |              |              |              |              |              |              |              |
|----------------|-------|-------------|-------------|-------------|--------------|--------------|--------------|--------------|--------------|--------------|--------------|--------------|--------------|
| 43             | 144.5 | 52.2        | 37.4        | 10.5        | 2.39         | 56.47        | 124          | 184          | 64.4         | 287.3        | 15           | 39.9         | 38           |
| 44             | 149.5 | 50.5        | 40.4        | 9.1         | 2.52         | 57.65        | 103          | 96.4         | 61.6         | 157.5        | 14           | 37.4         | 40           |
| 45             | 154.5 | 56.1        | 34.2        | 9.7         | 2.8          | 60.59        | 136          | 106.4        | 61.2         | 297.4        | 13           | 37.4         | 38           |
| 46             | 159.5 | 59.7        | 32.4        | 7.9         | 3.09         | 58.82        | 123          | 112.6        | 65.1         | 93.2         | 15           | 40           | 36           |
| 47             | 164.5 | 53.8        | 37.4        | 8.8         | 2.66         | 57.65        | 90           | 99.3         | 60.4         | 259.1        | 13           | 36.9         | 36           |
| 48             | 169.5 | 53.2        | 36.6        | 10.2        | 2.67         | 61.18        | 87           | 94.2         | 59.6         | 296.6        | 12           | 36.1         | 37           |
| 49             | 174.5 | 57.9        | 34.6        | 7.5         | 2.78         | 55.29        | 107          | 96.9         | 63.4         | 124.8        | 17           | 44           | 37           |
| 50             | 179.5 | 54.4        | 36.8        | 8.9         | 2.94         | 60           | 93           | 89           | 61.1         | 117.4        | 14           | 40           | 36           |
| 51             | 184.5 | 52.2        | 36.3        | 11.5        | 3.38         | 56.47        | 110          | 101.7        | 62.9         | 186.6        | 13           | 38.2         | 36           |
| 52             | 189.5 | 56.9        | 33.6        | 9.5         | 3.06         | 56.47        | 82           | 72.3         | 47.8         | 189.5        | 8            | 26.3         | 32           |
| 53             | 194.5 | 51.9        | 37.8        | 10.3        | 2.71         | 56.47        | 83           | 90           | 60.5         | 96.9         | 12           | 38           | 34           |
| 54             | 199.5 | 55.7        | 34.6        | 9.6         | 2.49         | 57.65        | 84           | 88.4         | 59.2         | 77.7         | 11           | 36.5         | 35           |
| 55             | 204.5 | 55.5        | 36.7        | 7.8         | 2.89         | 54.71        | 103          | 76.8         | 57.8         | 102          | 10           | 34.4         | 32           |
| 56             | 209.5 | 56.8        | 34.9        | 8.3         | 2.87         | 54.71        | 40.2         | 48.9         | 41.2         | 46.6         | 7            | 21.7         | 26           |
| 57             | 214.5 | 62.4        | 27.3        | 10.3        | 2.72         | 55.29        | 73.5         | 74.9         | 53.2         | 82.6         | 9            | 33.3         | 31           |
| 58             | 219.5 | 51.4        | 28.8        | 19.8        | 3.22         | 60           | 79.4         | 88.8         | 62.6         | 147.2        | 12           | 39.6         | 34           |
| <b>Minimum</b> |       | <b>36.9</b> | <b>0.5</b>  | <b>0.0</b>  | <b>2.20</b>  | <b>30.59</b> | <b>35.0</b>  | <b>45.7</b>  | <b>32.6</b>  | <b>21.2</b>  | <b>3.0</b>   | <b>18.9</b>  | <b>16.0</b>  |
| <b>Maximum</b> |       | <b>99.5</b> | <b>53.7</b> | <b>19.8</b> | <b>26.71</b> | <b>61.76</b> | <b>645.0</b> | <b>450.0</b> | <b>109.8</b> | <b>830.0</b> | <b>435.0</b> | <b>266.8</b> | <b>332.0</b> |
| <b>Average</b> |       | <b>73.6</b> | <b>22.6</b> | <b>3.8</b>  | <b>6.11</b>  | <b>52.48</b> | <b>208.3</b> | <b>188.0</b> | <b>60.7</b>  | <b>227.5</b> | <b>92.6</b>  | <b>51.8</b>  | <b>64.0</b>  |
